# Supplementary material for: Pengaruh infrastruktur terhadap pertumbuhan ekonomi di kota sukabumi: periode tahun 1990-2012
Source: MDPI journal article supplement (doi:10.3390/microorganisms9061338), 2014-01-01
Supplement: s1 [file s1]

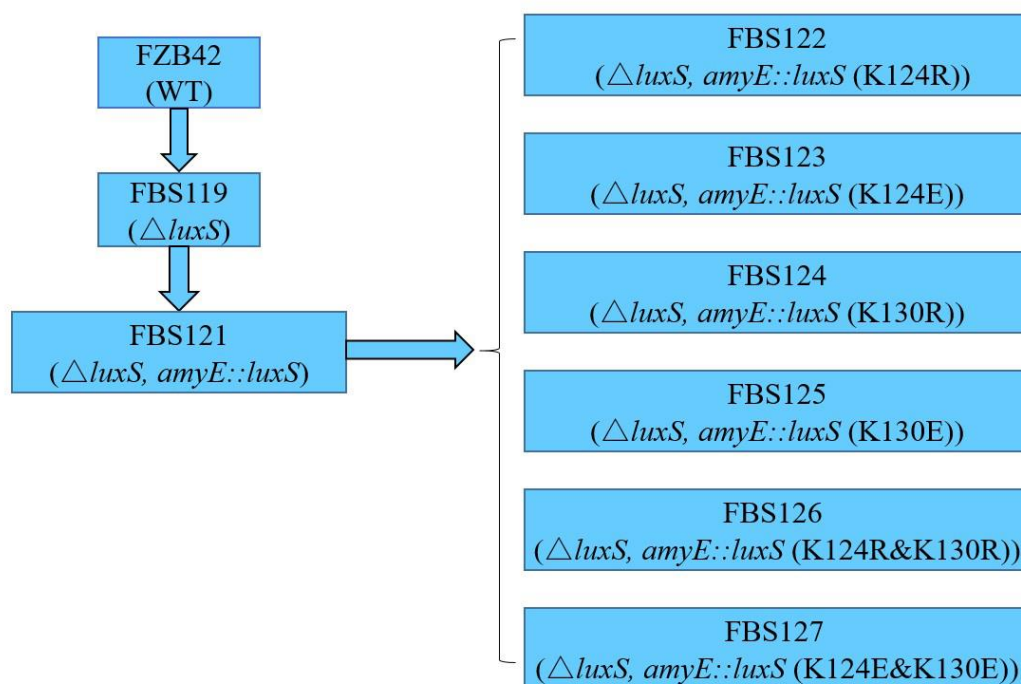

**Figure S1.** Schematic diagram of the construction of the *luxS*-related mutants.

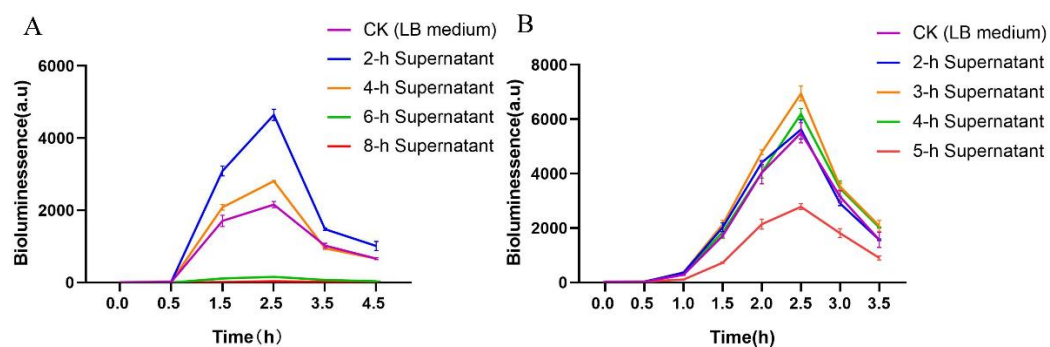

**Figure S2.** Induction of bioluminescence in *V. harveyi* BB170 by cell-free supernatants of FZB42 WT collected at different time.
